# Supplementary material
Source: publisher figshare collection journal article supplement (https://sage.figshare.com/ndownloader/files/36009536)
Supplement: Supplementary file 1 [file 36009536]

| **Sex: Male** | **Total Instances Observed (%), N = Total Evaluations Performed** | | | |
| --- | --- | --- | --- | --- |
| **Clinical Observation** | **Analysis of Deviance p-value** | **Cambodian** | **Chinese** | **Vietnamese** |
| Abdomen Distended | 0.24295 | 30 (0.33%), N=9069 | 6 (0.02%), N=29534 | - |
| Abrasion(s) | < 0.0001 | 148 (1.63%), N=9069 | 437 (1.48%), N=29534 | 193 (1.55%), N=12476 |
| Activity Decreased | 0.20551 | 3 (0.03%), N=9069 | 10 (0.03%), N=29534 | - |
| Annular Constriction | 0.04078 | 272 (3%), N=9069 | 407 (1.38%), N=29534 | - |
| Behavior Aggressive | 0.1294 | 5 (0.06%), N=9069 | 35 (0.12%), N=29534 | - |
| Breathing Shallow | - | - | 1 (0%), N=29534 | - |
| Bruise | 0.92635 | 3 (0.03%), N=9069 | 361 (1.22%), N=29534 | - |
| Coprophagy | - | - | 14 (0.05%), N=29534 | - |
| Coughing | - | - | 3 (0.01%), N=59068 | - |
| Deformity | 0.19071 | 291 (3.21%), N=9069 | 245 (0.83%), N=29534 | 6 (0.05%), N=12476 |
| Difficulty Injecting Dose | - | - | 1 (0%), N=29534 | - |
| Digit(s) Missing | - | - | 17 (0.03%), N=59068 | - |
| Discharge | < 0.0001 | 59 (0.65%), N=9069 | 112 (0.38%), N=29534 | 4 (0.03%), N=12476 |
| Discoloration | 0.06286 | 1 (0.01%), N=9069 | 3 (0.01%), N=29534 | - |
| Emesis | 0.00003 | 44 (0.49%), N=9069 | 133 (0.45%), N=29534 | 22 (0.18%), N=12476 |
| Eye Discolored | - | - | 5 (0.02%), N=29534 | - |
| Fasciculation | - | - | 1 (0%), N=29534 | - |
| Fecal Smearing | 0.00004 | 146 (1.61%), N=9069 | 52 (0.18%), N=29534 | - |
| Feces Discolored | < 0.0001 | 82 (0.9%), N=9069 | 274 (0.93%), N=29534 | 2522 (20.21%), N=12476 |
| Feces Few/Absent | 0.02658 | - | 5 (0.02%), N=29534 | 295 (2.36%), N=12476 |
| Feces Hard | 0.25251 | 2 (0.02%), N=9069 | 2 (0.01%), N=29534 | - |
| Feces Mucoid | 0.02888 | 8 (0.09%), N=9069 | 6 (0.02%), N=29534 | - |
| Feces Soft | < 0.0001 | 1523 (16.79%), N=9069 | 3864 (13.08%), N=29534 | 1246 (9.99%), N=12476 |
| Feces Watery | < 0.0001 | 390 (4.3%), N=9069 | 1926 (6.52%), N=29534 | 646 (5.18%), N=12476 |
| Hair Absent | 0.82198 | 1 (0.01%), N=9069 | - | 1 (0.01%), N=12476 |
| Hair Sparse | < 0.0001 | 2683 (29.58%), N=9069 | 9109 (30.84%), N=29534 | 5694 (45.64%), N=12476 |
| Inappetence | 0.46209 | 4 (0.04%), N=9069 | 107 (0.36%), N=29534 | 19 (0.15%), N=12476 |
| Laceration | 0.00292 | 25 (0.28%), N=9069 | 109 (0.37%), N=29534 | 18 (0.14%), N=12476 |
| Limb Function Impaired | - | - | 1 (0%), N=29534 | - |
| Loss Of Skin Elasticity | 0.00305 | 7 (0.08%), N=9069 | 9 (0.03%), N=29534 | - |
| Material In Pan/Bedding | 0.6815 | 14 (0.15%), N=9069 | 43 (0.15%), N=29534 | 6 (0.05%), N=12476 |
| No Abnormalities Detected | < 0.0001 | 3293 (36.31%), N=9069 | 12302 (41.65%), N=29534 | 2891 (23.17%), N=12476 |
| Nail Missing | 0.8911 | 8 (0.09%), N=9069 | 16 (0.05%), N=29534 | - |
| Nodule | 0.00009 | 314 (3.46%), N=9069 | 202 (0.68%), N=29534 | 21 (0.17%), N=12476 |
| Penis Extended | 0.10325 | 2 (0.02%), N=9069 | 6 (0.02%), N=29534 | 2 (0.02%), N=12476 |
| Piloerection | - | - | 1 (0%), N=29534 | - |
| Posture Hunched | 0.25745 | 4 (0.04%), N=9069 | 8 (0.03%), N=29534 | 1 (0.01%), N=12476 |
| Pupil Dilated | 0.54365 | 1 (0.01%), N=9069 | 6 (0.02%), N=29534 | - |
| Pustule | - | 2 (0.01%), N=18138 | - | - |
| Rectum Prolapsed | 0.00767 | 22 (0.24%), N=9069 | 25 (0.08%), N=29534 | 6 (0.05%), N=12476 |
| Red Discharge | - | - | 1 (0%), N=29534 | - |
| Salivation | 0.35708 | 1 (0.01%), N=9069 | 5 (0.02%), N=29534 | 2 (0.02%), N=12476 |
| Salivation After Dosing | - | - | 1 (0%), N=29534 | - |
| Scabbed Area | < 0.0001 | 1168 (12.88%), N=9069 | 2117 (7.17%), N=29534 | 1652 (13.24%), N=12476 |
| Scaling | - | 20 (0.22%), N=9069 | - | - |
| Scar | 0.00005 | 300 (3.31%), N=9069 | 163 (0.55%), N=29534 | 13 (0.1%), N=12476 |
| Skin Discolored | < 0.0001 | 1923 (21.2%), N=9069 | 5988 (20.27%), N=29534 | 1638 (13.13%), N=12476 |
| Skin Dry | 0.00001 | 209 (2.3%), N=9069 | 405 (1.37%), N=29534 | 159 (1.27%), N=12476 |
| Skin Thickened And Leathery | - | 8 (0.04%), N=18138 | - | - |
| Skin Thickening | - | - | 33 (0.01%), N=295340 | - |
| Stereotypy | 0.0555 | 8 (0.09%), N=9069 | 15 (0.05%), N=29534 | - |
| Struggling During Dosing | - | 2 (0.02%), N=9069 | - | - |
| Swelling | < 0.0001 | 24 (0.26%), N=9069 | 125 (0.42%), N=29534 | 217 (1.74%), N=12476 |
| Tail Bent | 0.70314 | 22 (0.24%), N=9069 | 127 (0.43%), N=29534 | 15 (0.12%), N=12476 |
| Tail Missing | - | 8 (0.09%), N=9069 | - | - |
| Tail Missing - Portion | 0.09814 | 141 (1.55%), N=9069 | 1296 (4.39%), N=29534 | - |
| Teeth Broken | - | - | 1 (0%), N=29534 | - |
| Teeth Discolored | - | - | 5 (0.02%), N=29534 | - |
| Teeth Missing | 0.25582 | 5 (0.06%), N=9069 | 7 (0.02%), N=29534 | - |
| Thin | 0.00088 | 19 (0.21%), N=9069 | 40 (0.14%), N=29534 | 3 (0.02%), N=12476 |
| Tremors | - | - | 1 (0%), N=29534 | - |
| Twitching | - | - | 3 (0%), N=88602 | - |
| Unkempt Appearance | 0.16165 | 4 (0.04%), N=9069 | 3 (0.01%), N=29534 | 1 (0.01%), N=12476 |
| Urine Discolored | - | - | 2 (0%), N=59068 | - |
| Vocalization | < 0.0001 | 74 (0.82%), N=9069 | 75 (0.25%), N=29534 | - |
